# Supplementary material for: Preparation and Characterization of Gluten/SDS/Chitosan Composite Hydrogel Based on Hydrophobic and Electrostatic Interactions
Source: MDPI journal article supplement (doi:10.3390/jfb14040222), 2023-04-14
Supplement: s1 [file s1]

# Supplementary Materials

## Preparation and Characterization of Gluten/SDS/Chitosan Composite Hydrogel Based on Hydrophobic and Electrostatic Interactions

Guangfeng Li <sup>1</sup>, Ni Lan <sup>1</sup>, Yanling Huang <sup>1</sup>, Chou Mo <sup>2</sup>, Qiaoli Wang <sup>1</sup>, Chaoxi Wu <sup>1,3,\*</sup> and Yifei Wang <sup>1,3,4,\*</sup>

<sup>1</sup> Department of Cell Biology, College of Life Science and Technology, Jinan University, Guangzhou 510642, China

<sup>2</sup> Guangdong Provincial Key Laboratory of Advanced Drug Delivery, Guangdong Provincial Engineering Center of Topical Precise Drug Delivery System, Guangdong Pharmaceutical University, Guangzhou 510006, China

<sup>3</sup> Key Laboratory of Innovative Technology Research on Natural Products and Cosmetics Raw Materials, Guangzhou 510642, China

<sup>4</sup> Guangdong Provincial Biotechnology Drug & Engineering Technology Research Center, Guangzhou 510642, China

\* Correspondence: chaoxiw@gmail.com (C.W.); twang-yf@163.com (Y.W.)

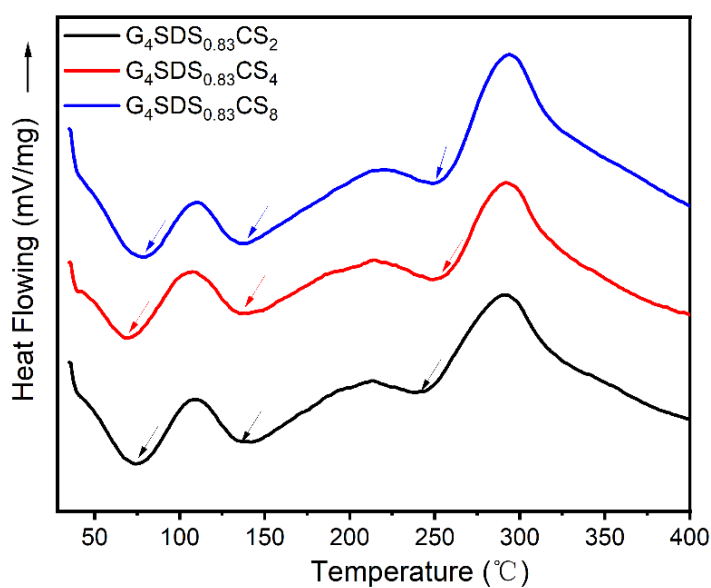

**Figure S1.** DSC thermograms of G<sub>4</sub>SDS<sub>0.83</sub>CS<sub>2</sub>, G<sub>4</sub>SDS<sub>0.83</sub>CS<sub>4</sub>, and G<sub>4</sub>SDS<sub>0.83</sub>CS<sub>8</sub> samples

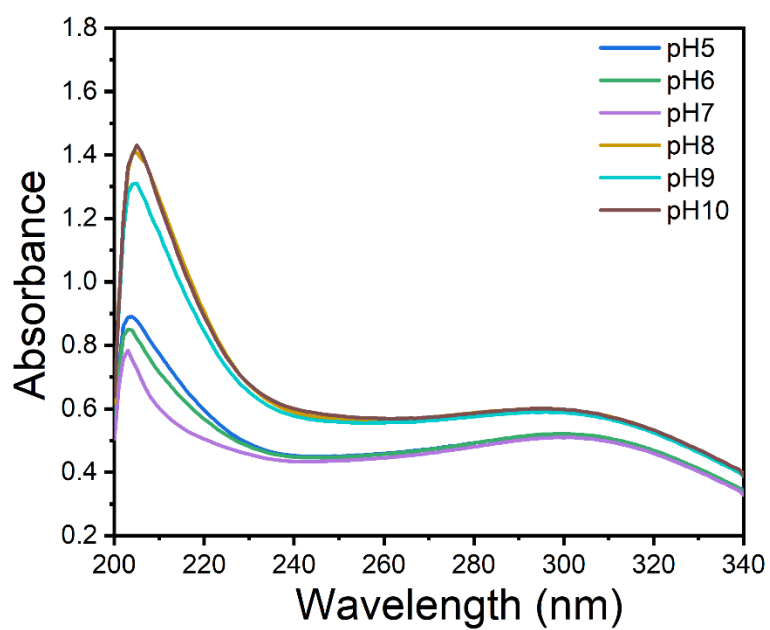

**Figure S2.** UV spectra of G<sub>4</sub>SDS<sub>0.83</sub>CS<sub>4</sub> sample at different pH.

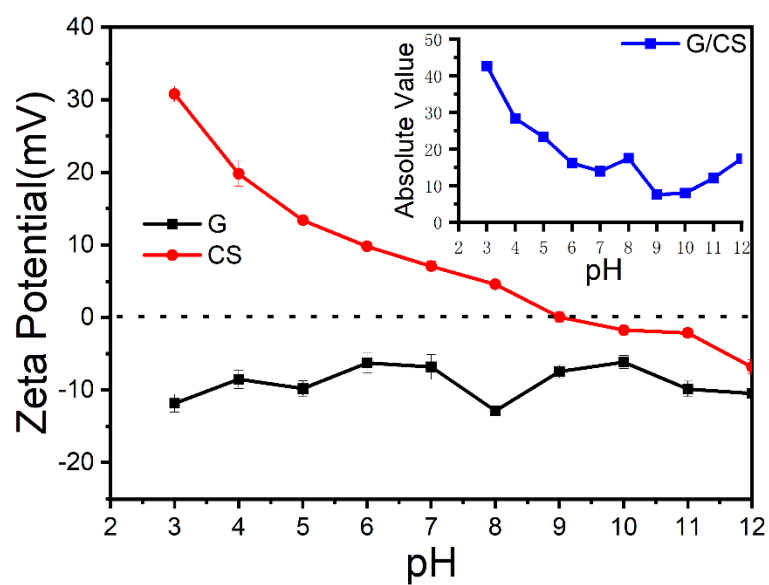

**Figure S3.** Zeta potential and the absolute potential value of G and CS at different pH.
